# Supplementary material for: Decomposing and analyzing contact resonance frequency in contact mode voltage modulated scanning probe microscopies
Source: Royal Society of Chemistry journal article supplement (doi:10.1039/d1cp04173h), 2022-01-01
Supplement: d1cp04173h1.pdf [file d1cp04173h1.pdf]

## Supplementary Information

### **Decomposing and Analyzing Contact Resonance Frequency in Contact Mode Voltage Modulated Scanning Probe Microscopies**

*Yue Liu<sup>1</sup>, Bingxue Yu<sup>1</sup>, Hongli Wang<sup>2</sup>, Kaiyang Zeng<sup>1,\*</sup>*

<sup>1</sup>Department of Mechanical Engineering, National University of Singapore, 9 Engineering Drive 1, Singapore 117576.  
E-mail: [mpezk@nus.edu.sg](mailto:mpezk@nus.edu.sg)

<sup>2</sup>The Key Lab of Guangdong for Modern Surface Engineering Technology, National Engineering Laboratory for Modern Materials Surface Engineering Technology, Institute of New Materials, Guangdong Academy of Sciences, Guangzhou 510650, China.

\*Corresponding author: Prof. K.Y.Zeng ([mpezk@nus.edu.sg](mailto:mpezk@nus.edu.sg))

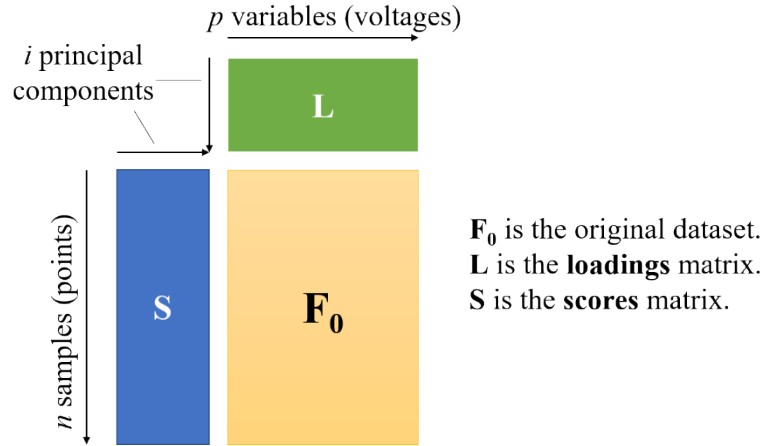

**Fig. S1** The schematic diagram of principal component analysis (PCA).

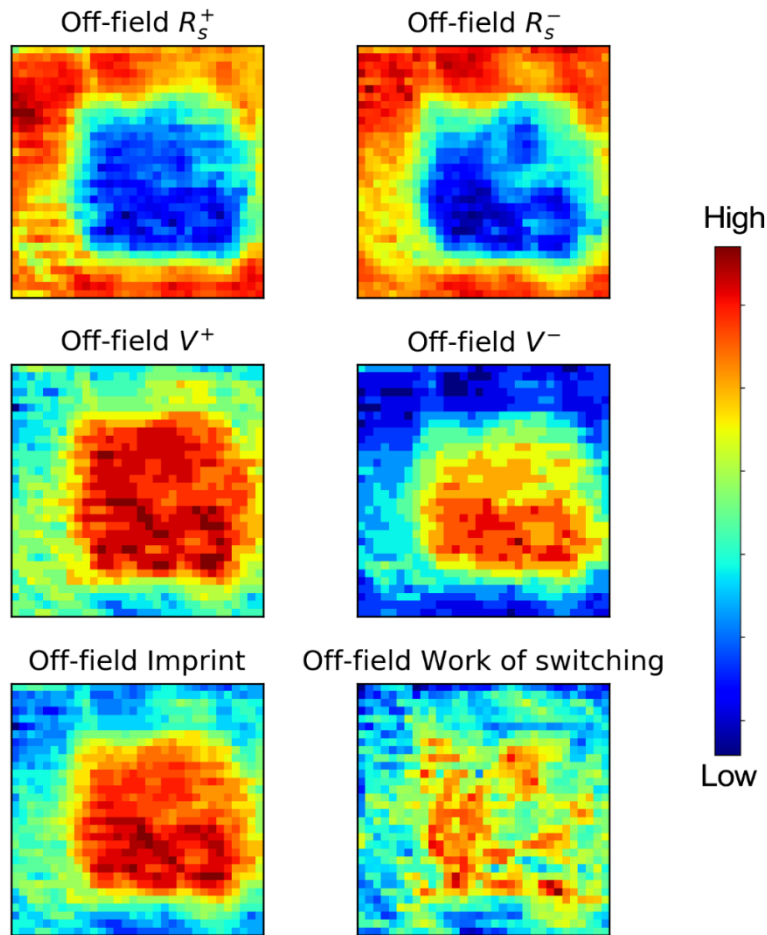

**Fig. S2** The maps of switching parameters calculated from the SS-PFM measurements that were conducted on PZN-4.5%PT at on- and off-field. First row images: forward and reverse saturation responses,  $R_s^+$ ,  $R_s^-$ ; second row images: forward and reverse coercive voltages,  $V^+$  and  $V^-$ ; and third row images: the work of switching is defined as the area within the loop. The imprint bias is defined as  $Im = (V^+ + V^-)/2$ . Image area:  $4 \times 4 \mu\text{m}^2$  with a resolution of  $32 \times 32$  points in the same area as shown in Figure 2 of the main text. The off-field and on-field hysteresis loops are shown in the Fig. 1(c, f) of the main text of this paper, respectively.

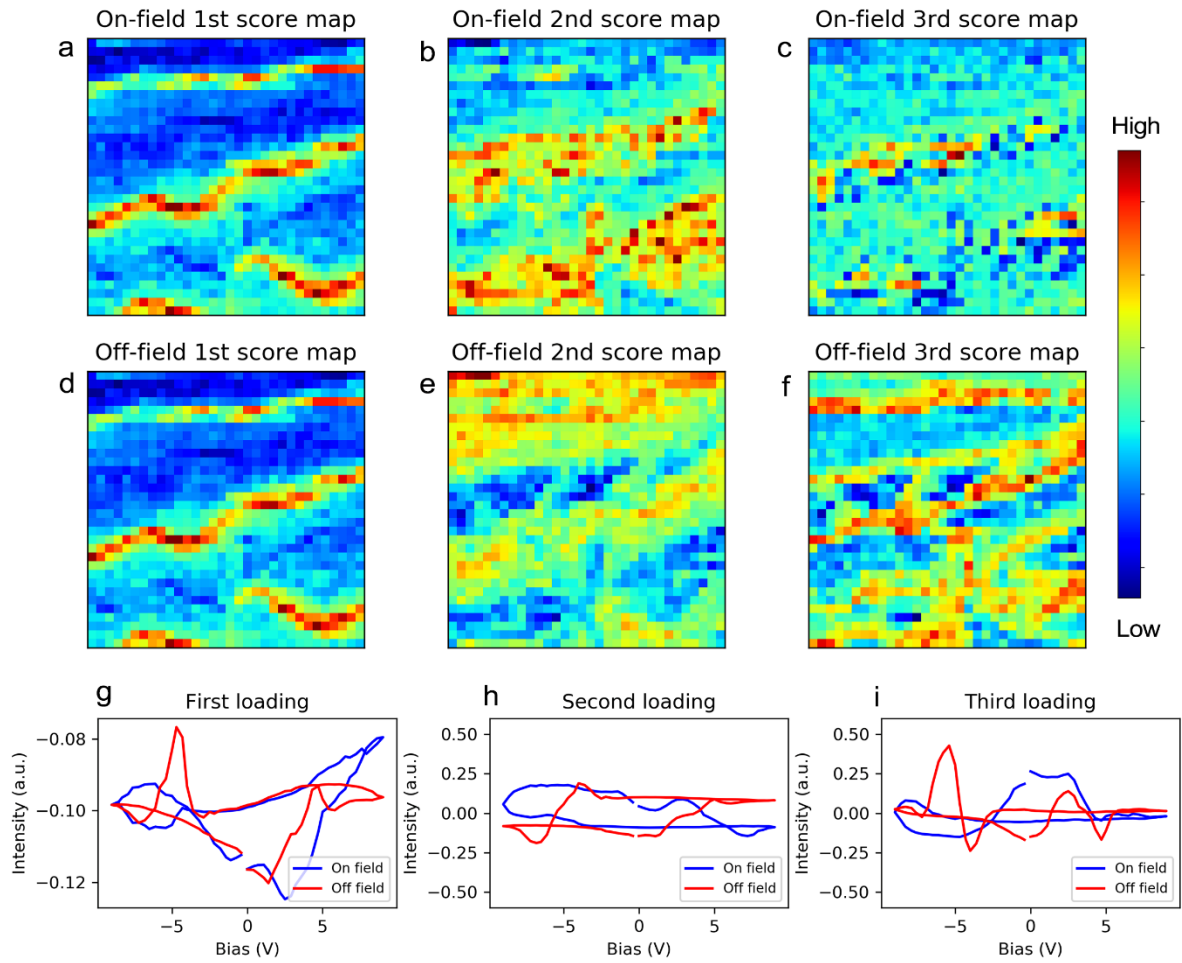

**Fig. S3** Principal component analysis (PCA) on the contact resonance frequency ( $f_0$ ) of PZN-4.5%PT in the SS-PFM measurements: (a-c) The score maps for the first three principal components at the on-field; (d-f) The score maps for the first three principal components at the off-field; and (g-i) The loadings for the first three principal components. The percentages of variance explained by the first, the second, and the third on-field principal components are 87.95%, 3.74%, and 1.20%, respectively; at the off field, they are 91.35%, 2.87%, and 0.85%, respectively. The SS-PFM mapping is scanned in a  $4 \times 4 \mu\text{m}^2$  area with a resolution of  $32 \times 32$  points. The area is with spontaneous polarization.

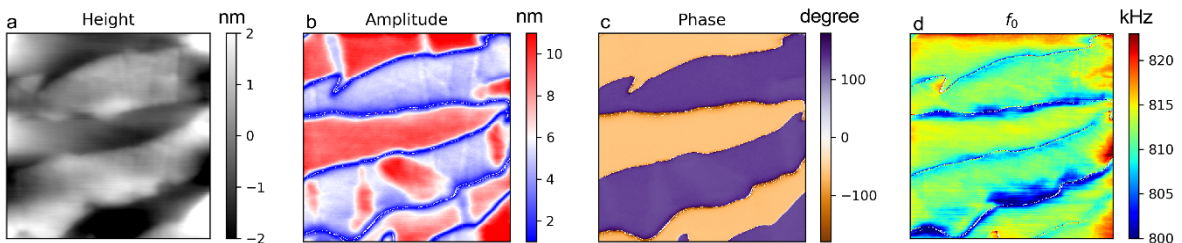

**Fig. S4** The PFM images of PZN-4.5%PT: (a) Height; (b) Amplitude; (c) Phase; and (d) Contact resonance frequency ( $f_0$ ) in an area of  $4 \times 4 \mu\text{m}^2$ . The resolution is  $256 \times 256$  pixels. The area is with spontaneous polarization.

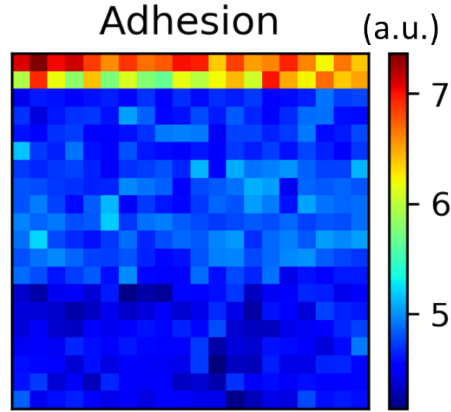

**Fig. S5** The adhesion force map in the SM-ESM measurement conducted on PMMA. The maps are scanned in a  $10 \times 10 \mu\text{m}^2$  area with a resolution of  $20 \times 20$  points.

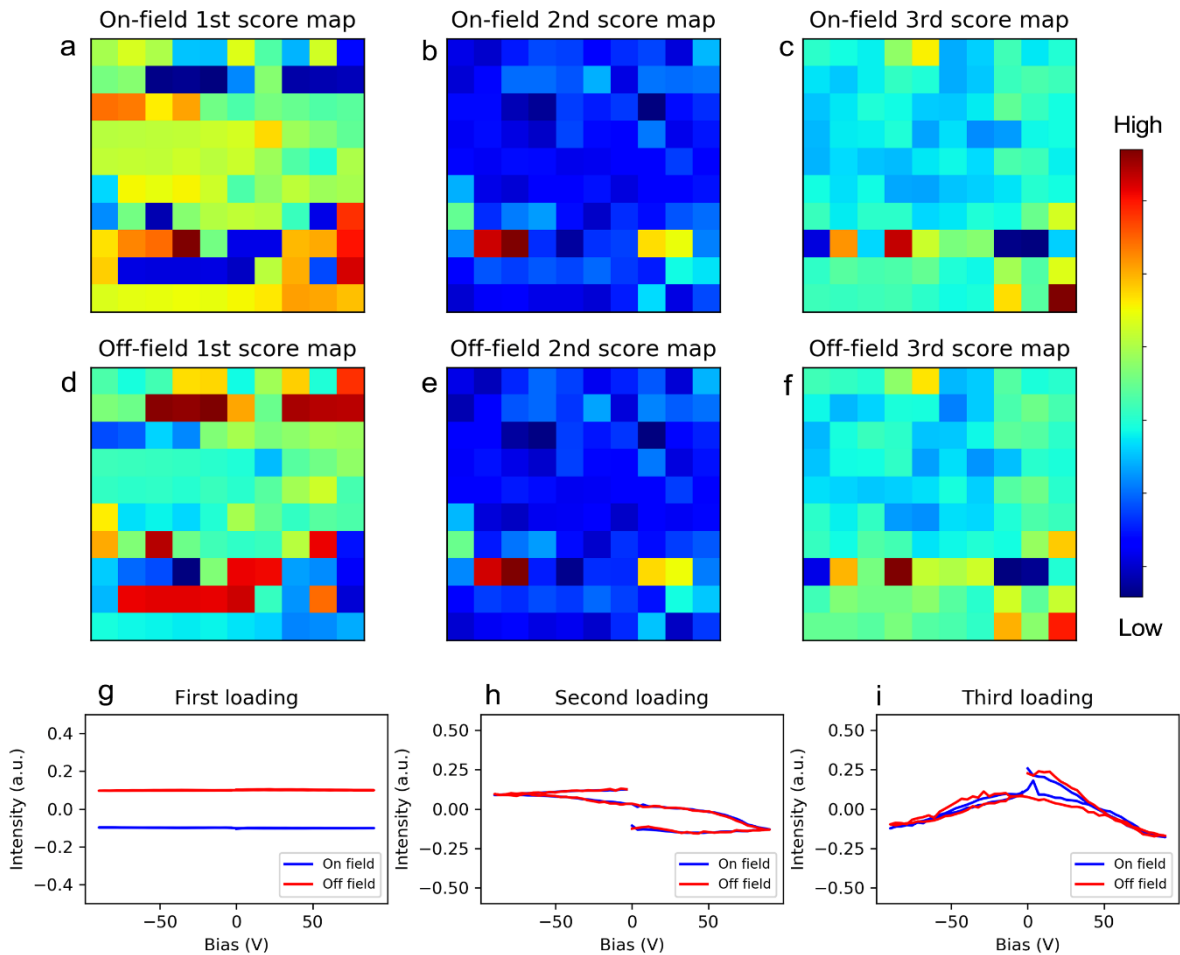

**Fig. S6** Principal component analysis (PCA) on the contact resonance frequency ( $f_0$ ) of glass in the SM-ESM measurements: (a-c) The score maps for the first three principal components at the on-field; (d-f) The score maps for the first three principal components at the off-field; and (g-i) The loadings for the first three principal components. The percentages of variance explained by the first, the second, and the third on-field principal components are 99.68%, 0.22%, and 0.05%, respectively; at the off field, they are 99.64%, 0.22%, and 0.06%, respectively. The SM-ESM measurement is scanned in a  $10 \times 10 \mu\text{m}^2$  area with a resolution of  $10 \times 10$  points.

**Table S1.** Pearson’s correlation coefficients ( $r$ ) of the PCA score maps, and the cosine similarity ( $s$ ) of the PCA loadings of the ferroelectric materials. The PCA score maps and loadings are decomposed from the SS-PFM contact resonance frequency ( $f_0$ ) dataset obtained from PZN-4.5%PT, PZN-7%PT, PZN-9%PT, and BLGF-35%PT. All the scanned areas are with spontaneous polarization.

|            |                 | $r$ of score maps |                 |                 | $s$ of loadings |                 |                 |                 |
|------------|-----------------|-------------------|-----------------|-----------------|-----------------|-----------------|-----------------|-----------------|
|            |                 | Off               | 1 <sup>st</sup> | 2 <sup>nd</sup> | 3 <sup>rd</sup> | 1 <sup>st</sup> | 2 <sup>nd</sup> | 3 <sup>rd</sup> |
|            | On              |                   |                 |                 |                 |                 |                 |                 |
| PZN-4.5%PT | 1 <sup>st</sup> |                   | 1.00**          | 0.01            | -0.03           | 1.00            | 0.00            | -0.01           |
|            | 2 <sup>nd</sup> |                   | 0.04            | -0.84**         | 0.2**           | 0.01            | -0.76           | -0.16           |
|            | 3 <sup>rd</sup> |                   | -0.04           | -0.47**         | -0.41**         | 0.02            | -0.36           | -0.06           |
| PZN-7%PT   | 1 <sup>st</sup> |                   | 1.00**          | 0.06            | -0.02           | 1.00            | -0.05           | -0.01           |
|            | 2 <sup>nd</sup> |                   | 0.05            | -0.04           | 0.48**          | 0.03            | 0.35            | 0.43            |
|            | 3 <sup>rd</sup> |                   | -0.04           | 0.77**          | 0.20**          | -0.01           | 0.28            | -0.51           |
| PZN-9%PT   | 1 <sup>st</sup> |                   | 1.00**          | 0.01            | 0.01            | 0.97            | -0.02           | -0.07           |
|            | 2 <sup>nd</sup> |                   | -0.00           | -0.28**         | 0.38**          | -0.03           | 0.01            | 0.05            |
|            | 3 <sup>rd</sup> |                   | 0.00            | 0.55**          | -0.44**         | 0.00            | -0.01           | -0.01           |
| BLGF-35%PT | 1 <sup>st</sup> |                   | 0.96**          | 0.17**          | -0.13**         | 0.98            | 0.04            | 0.09            |
|            | 2 <sup>nd</sup> |                   | -0.25**         | 0.58**          | -0.49**         | -0.09           | -0.13           | 0.13            |
|            | 3 <sup>rd</sup> |                   | -0.00           | 0.69**          | 0.64**          | 0.06            | 0.57            | 0.21            |

$p$ -value of the Pearson’s correlation: (\*) for  $p < 0.05$ , (\*\*) for  $p < 0.01$

**Table S2.** Pearson’s correlation coefficients ( $r$ ) of the first, second and third PCA score maps, and the cosine similarity ( $s$ ) of the first three PCA loadings of the non-ferroelectric materials. The PCA score maps and loadings are decomposed from the contact resonance frequency ( $f_0$ ) dataset of the SM-ESM measurements obtained from glass and TiO<sub>2</sub>.

|                  |                 | $r$ of score maps |                 |                 | $s$ of loadings |                 |                 |                 |
|------------------|-----------------|-------------------|-----------------|-----------------|-----------------|-----------------|-----------------|-----------------|
|                  |                 | Off               | 1 <sup>st</sup> | 2 <sup>nd</sup> | 3 <sup>rd</sup> | 1 <sup>st</sup> | 2 <sup>nd</sup> | 3 <sup>rd</sup> |
|                  | On              |                   |                 |                 |                 |                 |                 |                 |
| Glass            | 1 <sup>st</sup> |                   | -1.00**         | 0.00            | 0.00            | -1.00           | 0.00            | 0.01            |
|                  | 2 <sup>nd</sup> |                   | 0.00            | 1.00**          | 0.01            | 0.00            | 1.00            | -0.02           |
|                  | 3 <sup>rd</sup> |                   | 0.00            | -0.01           | 0.97**          | 0.00            | 0.01            | 0.97            |
| TiO <sub>2</sub> | 1 <sup>st</sup> |                   | 0.99**          | 0.02            | -0.02           | 1.00            | -0.01           | 0.00            |
|                  | 2 <sup>nd</sup> |                   | 0.03            | -0.94**         | 0.05            | -0.01           | -1.00           | 0.04            |
|                  | 3 <sup>rd</sup> |                   | -0.00           | 0.12            | -0.79**         | 0.00            | -0.03           | -0.97           |

$p$ -value of the Pearson’s correlation: (\*) for  $p < 0.05$ , (\*\*) for  $p < 0.01$

**Table S3.** The percentages of variance explained by the first, second and third principal components of the ferroelectric materials.

| Sample                                   | Field | 1 <sup>st</sup> | 2 <sup>nd</sup> | 3 <sup>rd</sup> |
|------------------------------------------|-------|-----------------|-----------------|-----------------|
| PZN-4.5%PT<br>(poled by DC)              | On    | 83.58%          | 4.70%           | 3.87%           |
|                                          | Off   | 90.80%          | 2.88%           | 1.27%           |
| PZN-4.5%PT<br>(spontaneous polarization) | On    | 87.95%          | 3.74%           | 1.20%           |
|                                          | Off   | 91.35%          | 2.87%           | 0.85%           |
| PZN-7%PT                                 | On    | 92.73%          | 1.47%           | 1.11%           |
|                                          | Off   | 90.51%          | 1.91%           | 1.56%           |
| PZN-9%PT                                 | On    | 83.93%          | 5.33%           | 4.09%           |
|                                          | Off   | 88.08%          | 2.48%           | 1.94%           |
| BLGF-35%PT                               | On    | 68.04%          | 12.38%          | 6.31%           |
|                                          | Off   | 76.17%          | 9.96%           | 4.59%           |

**Table S4.** The percentages of variance explained by the first, second and third principal components of the non-ferroelectric materials.

| Sample                         | Field | 1 <sup>st</sup> | 2 <sup>nd</sup> | 3 <sup>rd</sup> |
|--------------------------------|-------|-----------------|-----------------|-----------------|
| PMMA                           | On    | 98.88%          | 0.42%           | 0.21%           |
|                                | Off   | 98.98%          | 0.43%           | 0.20%           |
| glass                          | On    | 99.68%          | 0.22%           | 0.05%           |
|                                | Off   | 99.64%          | 0.22%           | 0.06%           |
| Al <sub>2</sub> O <sub>3</sub> | On    | 95.40%          | 2.92%           | 0.93%           |
|                                | Off   | 95.60%          | 2.82%           | 0.79%           |
| TiO <sub>2</sub>               | On    | 93.78%          | 4.70%           | 1.01%           |
|                                | Off   | 94.24%          | 4.50%           | 0.74%           |
